# Effects of Digoxin on Myocardial Oxygen Supply and Demand in Patients Following Coronary Artery Bypass Surgery

Dhun Sethna, M.D.,\* Emerson Moffitt, M.D.,† Richard Gray, M.D.,‡ John Bussell, M.D.,§  
Marjorie Raymond, R.N.,¶ Carolyn Conklin, R.N.,¶ William Shell, M.D.,\*\* Jack Matloff, M.D.††

Although digoxin is used frequently in patients in the prophylaxis of postoperative supraventricular tachyarrhythmias, the effects of the drug on myocardial oxygen supply and demand after coronary bypass have not been described. Seven adult patients with good ventricular function who underwent myocardial revascularization were studied before and three hours after digoxin (0.5 mg, iv). There were no significant changes observed in any measured systemic hemodynamic variable. Evaluation of global myocardial metabolism showed an increase in myocardial oxygen consumption ( $P < 0.05$ ) which was compensated satisfactorily, as no significant alteration was noted in the coronary sinus oxygen content, or in the lactate gradient across the myocardium.

Since the authors studied the effects of only one dose of digoxin, the effects of full digitalization in these patients remains to be defined. (Key words: Anesthesia; cardiovascular. Heart; blood flow, myocardial; coronary occlusion; digitalis; metabolism; oxygen consumption. Surgery; cardiovascular.)

DIGITALIS GLYCOSIDES have been used for decades in the management of patients following cardiac surgery.<sup>1-7</sup> The most frequent use of digoxin in patients after myocardial revascularization is in the prophylaxis and therapy of postoperative supraventricular tachyarrhythmias.<sup>8-11</sup> In addition, the drug may provide cardiac reserve to the postoperative patient in whom left ventricular dysfunction occurs without clinical heart failure. Any consideration of these benefits must be made in relation to the effects of the drug on myocardial oxygen supply and demand, since digoxin may impose an undesirable metabolic cost to the myocardium simultaneous with its clinical effect.<sup>12-15</sup> An evaluation of the metabolic cost of digitalis administered for arrhythmia prophylaxis following myocardial revascularization has not been described. Accordingly, the goal of the present study was to examine the acute effects of digoxin on myocardial

oxygen consumption and myocardial lactate extraction in conscious patients following coronary artery bypass surgery, relating the data to concurrent changes in hemodynamics.

## Materials and Methods

According to a protocol approved by the Human Subjects Committee of this institute, seven patients (6 male, 1 female; age,  $58 \pm 8$  years [mean  $\pm$  SD]) were studied. Informed consent was obtained from all patients. The study was done in the Cardiac Surgical Intensive Care Unit on the day following surgery. All patients were conscious and in the fasting state. The patients had not received a digitalis preparation for at least 72 h before the study. Two patients were on chronic beta-adrenergic blockade therapy; the last dose of propranolol was 36 h before the study. One patient required 4 mg morphine sulfate subcutaneously for incisional pain 2.5 h before the study. The other patients had received 2-4 mg morphine, iv, or subcutaneously 6-15 h before the study. Of the remaining patients, none received a vasoactive drug whose effect might persist at the time of study.

All patients had preoperative chronic stable angina or medically responsive unstable angina. Although 4/7 patients had previous documented myocardial infarctions, mean angiographic ejection fraction was normal ( $0.71 \pm 0.11$ ). Three patients had single-vessel disease, and two patients each had double- or triple-vessel disease of the coronary arteries. Each of the patients was judged to be completely revascularized by the surgeon (range of number of grafts inserted: 3-5), as all vessels with greater than 50 per cent obstruction were bypassed.

One patient developed an intraoperative myocardial infarction as assessed by the presence of serial electrocardiographic and serum enzymatic changes. The infarct was small and well-tolerated; at the time of study the patient had a cardiac index of  $3.27 \text{ l} \cdot \text{min}^{-1} \cdot \text{m}^{-2}$ . This patient's metabolic response to digoxin was not substantially different from the other patients who did not develop an intraoperative myocardial infarction.

The following catheters were introduced in each patient: (1) an 18-gauge cannula in the radial artery; (2) a thermodilution triple-lumen catheter (Edwards) by the Seldinger technique through the right internal jugular vein into the pulmonary artery; and (3) a coronary sinus catheter (Wilton-Webster Laboratories, Altadena, California) by the same route and technique into the coro-

\* Associate Cardiologist.

† Professor and Chairman, Department of Anaesthesia, Dalhousie University, Halifax, Nova Scotia, Canada.

‡ Assistant Professor of Medicine, UCLA.

§ Associate Anesthesiologist.

¶ Research Nurse.

\*\* Associate Professor of Medicine, UCLA.

†† Chairman, Department of Thoracic and Cardiovascular Surgery, Cedars-Sinai Medical Center, Los Angeles, California.

Received from the Departments of Thoracic and Cardiovascular Surgery, Anesthesiology and Cardiology, Cedars-Sinai Medical Center, 8700 Beverly Boulevard, Los Angeles, California 90048. Accepted for publication October 13, 1981.

Address reprint requests to Dr. Dhun Sethna: Department of Thoracic and Cardiovascular Surgery, Anesthesiology and Cardiology, Cedars-Sinai Medical Center, 8700 Beverly Boulevard, Los Angeles, California 90048.

TABLE 1. Hemodynamic Response to Digoxin in Patients (N = 7) Following Coronary Artery Bypass Surgery

|           | Intervention    | HR<br>(beats/min)       | MAP<br>(mmHg)            | PCW<br>(mmHg)         | SVR<br>(dyne · s · cm <sup>-5</sup> ) | CI<br>(l · min <sup>-1</sup> · m <sup>-2</sup> ) |
|-----------|-----------------|-------------------------|--------------------------|-----------------------|---------------------------------------|--------------------------------------------------|
| Mean ± SD | Before<br>After | 85 ± 10<br>90 ± 9<br>NS | 89 ± 10<br>87 ± 12<br>NS | 10 ± 3<br>9 ± 2<br>NS | 1,129 ± 241<br>1,066 ± 237<br>NS      | 3.17 ± 0.3<br>3.30 ± 0.3<br>NS                   |

Abbreviations: HR = heart rate; MAP = systemic mean arterial pressure; PCW = mean pulmonary capillary wedge pressure; SVR

= systemic vascular resistance; CI = cardiac index; NS = not significant.

nary sinus by fluoroscopy, such that the external thermometer was 10–20 mm inside the coronary sinus.

After control measurements, digoxin (0.5 mg) was infused over a period of five minutes into an arm vein through the side-arm of an infusion tubing. The patient was unaware that the drug was being administered. Coronary sinus blood flow was measured by the thermodilution technique as described by Ganz *et al.*<sup>16</sup> Arterial and coronary sinus blood samples were obtained simultaneously for determination of lactate and oxygen concentrations. Lactate samples were analyzed in duplicate by a modification of the Marbach method.<sup>17</sup> Blood samples were analyzed immediately for O<sub>2</sub> saturation and hemoglobin concentration (IL CO-oximeter, model 282). Oxygen content (ml O<sub>2</sub>/dl) was calculated as: Hb × O<sub>2</sub> per cent saturation × 1.34. Systemic and pulmonary arterial, pulmonary capillary wedge, and right atrial pressures were measured and recorded on paper using a 6-channel chart recorder (VR-6 Electronics for Medicine). Cardiac outputs were measured in duplicate by thermodilution. Arterial blood pressure, EKG lead II, and the patient's clinical condition were monitored continually. Measurements were repeated at 10, 30, and 180 min after the digoxin infusion.

Hemodynamic indices were calculated from pressure and output data according to standard formulae. Metabolic indices were calculated as follows:

$$\text{Lactate extraction ratio} = \frac{\text{ART (lactate)} - \text{CS (lactate)}}{\text{ART (lactate)}}$$

where ART (lactate) is the arterial lactate concentration (mEq/l) and CS (lactate) is the coronary sinus lactate concentration (mEq/l).

$$\text{MVO}_2 = \text{CBF} \times (\text{ART \{oxygen\}} - \text{CS \{oxygen\}})$$

where MVO<sub>2</sub> is oxygen consumption of the myocardium

drained by the coronary sinus (predominantly the left ventricular myocardium) and CBF is coronary blood flow.

Statistical evaluation was done using a Wilcoxon paired test comparing measurements before and after digoxin in each patient.

## Results

Hemodynamic data before and 180 min after the digoxin infusion for the group are shown in table 1. There were no significant alterations in any of the hemodynamic variables measured at any time after drug administration for the group as a whole. However, modest variation in hemodynamic function was noted in individual patients. Cardiac output slightly increased in two patients, but this was explained by increases in heart rate.

The myocardial metabolic results for the group are shown in table 2. Digoxin produced an increase in the calculated myocardial oxygen consumption in six patients, with a mean increase of 21 per cent for the entire group ( $P < 0.05$ ). This was accompanied by a parallel increase in coronary blood flow in four patients resulting in an overall nonsignificant 11 per cent increase for the group. The mean coronary sinus oxygen content for the group remained unchanged. Alterations in the mean global myocardial lactate extraction for the entire group were not significant.

The increase in myocardial oxygen consumption was not reflected by the rate-pressure product as an indirect index of this variable ( $r = 0.1$ ). None of the other measured or calculated hemodynamic variables correlated with the increase in myocardial oxygen consumption.

None of the patients experienced chest discomfort or adverse reactions during the study. Continued monitoring of EKG lead II revealed no alterations in cardiac rhythm, ST segments or T waves.

TABLE 2. Myocardial Metabolic Response to Digoxin in Patients (N = 7) Following Coronary Artery Bypass Surgery

|           | Intervention    | CSBF<br>(ml/min)           | CVR<br>(mmHg · ml <sup>-1</sup> · min) | CS-O <sub>2</sub> Content<br>(ml/dl) | MVO <sub>2</sub><br>(ml/min)          | MLE<br>(Per Cent)        | RPP                                    |
|-----------|-----------------|----------------------------|----------------------------------------|--------------------------------------|---------------------------------------|--------------------------|----------------------------------------|
| Mean ± SD | Before<br>After | 116 ± 35<br>129 ± 44<br>NS | 0.73 ± 0.26<br>0.65 ± 0.24<br>NS       | 6.1 ± 0.5<br>6.2 ± 0.7<br>NS         | 7.2 ± 1.8<br>8.7 ± 2.1<br>$P = 0.046$ | 31 ± 17<br>20 ± 11<br>NS | 12,366 ± 2,989<br>12,846 ± 3,003<br>NS |

Abbreviations: CSBF = coronary sinus blood flow; CVR = coronary vascular resistance; CS-O<sub>2</sub> = oxygen content in coronary sinus blood;

MVO<sub>2</sub> = myocardial oxygen consumption; MLE = myocardial lactate extraction; RPP = rate-pressure product.

## Discussion

Although digoxin is used frequently for arrhythmia prophylaxis following myocardial revascularization, the myocardial metabolic cost imposed by the drug in this setting is unknown. Our study examined the myocardial metabolic cost of digoxin, specifically its effects on myocardial oxygen supply and demand.

It is important to describe closely the patients studied, because results obtained in one clinical or hemodynamic setting may not apply to all patients. Each patient was judged to be completely revascularized by the surgeon. The study was performed the day following surgery, and each patient was hemodynamically stable with good ventricular function. The mean pulmonary capillary wedge pressure for the group was 10 mmHg, and the cardiac index was greater than  $2.5 \text{ l} \cdot \text{min}^{-1} \cdot \text{m}^{-2}$ , in each patient at the time of study. Thus, the patients did not have low output syndrome or congestive heart failure.

Hemodynamic studies on the acute cardiovascular effects of digoxin in the non-failing heart in the absence and presence of coronary artery disease<sup>14,15,18-20</sup> and in patients during and following myocardial infarction<sup>21,22</sup> have shown a consistent digitalis-related increase in myocardial contractility, with a decrease in left ventricular filling pressures. The cardiac output may not increase<sup>14</sup> or may even decrease.<sup>15</sup> In the present study, small variations were observed in the measured hemodynamic variables between patients, but no consistent change was noted. Although an increase in systemic vascular resistance has been described following a rapid infusion of digoxin,<sup>23</sup> this effect was not observed in our patients. Indeed, in most patients a slight fall in calculated systemic vascular resistance was observed.

Metabolic studies in non-operated patients with coronary artery disease and preserved ventricular function have shown that digitalis glycosides cause either no change or an increase in myocardial oxygen consumption as a result of an increase in myocardial contractility.<sup>14,15</sup> In these studies, the increased oxygen demand usually was adequately met by an increase in coronary blood flow and/or compensated by a digoxin-induced reduction in ventricular volume resulting in reduction in myocardial wall tension.<sup>14</sup> In our patients, digoxin caused an increase in myocardial oxygen consumption. An increase in myocardial contractility would seem the most reasonable cause of this increased myocardial oxygen consumption, since no significant alterations in heart rate, preload, and afterload were noted. This increase in oxygen demand was satisfactorily compensated, as no significant change was noted in the measured coronary sinus oxygen content or in the measured lactate gradient across the myocardium.

The rate-pressure product is used frequently as an

indirect index of myocardial oxygen demand.<sup>24-26</sup> In our study, this index did not correlate with the myocardial oxygen consumption in the presence of digitalis.

Limitations of the technique for measuring coronary sinus blood flow used in this study have been summarized.<sup>16,27,28</sup> We feel this technique provides meaningful information regarding the magnitude and direction of changes in coronary blood flow when measured sequentially in the same patient. A potential technical criticism relates to the validity of comparative coronary sinus blood flow determinations by the thermodilution technique whenever right atrial pressure is elevated. In all patients, the positional stability of the catheter in the coronary sinus, and the absence of major reflux into the mouth of the coronary sinus was assessed as suggested by Mathey *et al.*<sup>29</sup>

The present study was done under clinical conditions in postoperative patients. Two patients were on chronic beta-adrenergic blockade before surgery. One patient received morphine sulfate subcutaneously 2.5 h before the study for postoperative pain. We cannot rule out the contribution of these medications to the hemodynamic and metabolic responses observed.

We must be cautious in judging the myocardial safety of digoxin in patients following myocardial revascularization from our data. Only one dose of the drug was studied; the effect of full digitalization in similar patients remains to be defined. Alterations in regional myocardial blood flow and regional myocardial metabolism may not be reflected in the overall global evaluation of myocardial metabolic function. Our study could not examine regional myocardial pathophysiology, and the effect of digoxin on these parameters remains to be determined.

The authors thank Drs. Aurelio Chaux, Alfonso Miyamoto, Hector Sustaita, Myles Lee, and Robert Kass for allowing them to include their patients in this study; Dr. Harvey Brown for performing the blood CO-oximetry measurements, and JoAnn Prause for statistical analysis.

## References

1. Willman VL, Cooper T, Hanlon CR: Prophylactic and therapeutic use of digitalis in open-heart operations. *Arch Surg* 80:860-863, 1960
2. Cooper TC, Willman VL, Zaliracopoulos P, et al: Effect of prophylactic digitalization on myocardial function after elective cardiac arrest. *Ann Surg* 151:17-21, 1960
3. Wheat MW Jr, Burford TH: Digitalis in surgery. *J. Thorac Cardiovasc Surg* 41:162-168, 1961
4. Bernstein S, Meichaus JE, Magidson O, et al: Digitalis in open-heart operations. *Calif Med* 94:302-303, 1961
5. Bristow JD, Griswold HE: The use of digitalis in cardiovascular surgery. *Prog. Cardiovasc Dis* 7:387-397, 1965
6. Burman SO: Digitalis and thoracic surgery. *J Thorac Cardiovasc Surg* 50:873-881, 1965
7. Pintor PP, Magri G: Digitalis and mitral surgery. *Cardiology* 55:34-40, 1970
8. O'Kane H, Geha A, Bane A, et al: Prophylactic digitalization in

- aorto coronary bypass patients. *Circulation* 45-46 (Suppl II): 199, 1972
9. Johnson LW, Dickstein RA, Fruehan CR, et al: Prophylactic digitalization for coronary artery bypass surgery. *Circulation* 53:819-822, 1976
10. Tyras DH, Stothert JC, Kaiser GC, et al: Supraventricular tachyarrhythmias after myocardial revascularization: A randomized trial of prophylactic digitalization. *J Thorac Cardiovasc Surg* 77:310-314, 1979
11. Csicsko JF, Schatzlein MH, King RD: Immediate postoperative digitalization in the prophylaxis of supraventricular arrhythmias following coronary artery bypass. *J Thorac Cardiovasc Surg* 81:419-422, 1981
12. Covell JW, Braunwald E, Ross J Jr, et al: Studies on digitalis. XVI.—Effects on myocardial oxygen consumption. *J Clin Invest* 45:1535-1542, 1966
13. Coleman HN III: Role of acetylcholinesterase in augmenting myocardial consumption: Relation of increased O<sub>2</sub> consumption to changes in velocity of contraction. *Circ Res* 21:487-495, 1967
14. DeMots H, Rahimtoola SH, Kremkau EL, et al: Effects of ouabain on myocardial oxygen supply and demand in patients with chronic coronary artery disease. A hemodynamic volumetric, and metabolic study in patients without heart failure. *J Clin Invest* 58:312-319, 1976
15. Kotter V, Schuren KP, Schroder W: Effect of digoxin on coronary blood flow and myocardial oxygen consumption in patients with chronic coronary artery disease. *Am J Cardiol* 42:563-569, 1978
16. Ganz W, Tamura K, Marcus HS, et al: Measurement of coronary sinus blood flow by continuous thermodilution in man. *Circulation* 44:181-195, 1971
17. Marbach EP, Weil MH: Rapid enzymatic measurements of blood lactate and pyruvate. *Clin Chem* 13:314-325, 1967
18. Kahler RL, Thompson RH, Buskirk ER, et al: Studies on digitalis. Reduction of the oxygen debt after exercise with digoxin in cardiac patients without heart failure. *Circulation* 27:397-405, 1963
19. Mason DT, Braunwald E: Studies on digitalis. IX.—Effects of ouabain on the non-failing human heart. *J Clin Invest* 42:1105-1111, 1963
20. Braunwald E, Bloodwell RD, Goldberg LI, et al: Studies on digitalis. IV.—Observations in man on the effects of digitalis preparations, the contractility of the nonfailing heart on the vascular resistance. *J Clin Invest* 40:52-59, 1961
21. Rahimtoola SH, Sinno MZ, Chuquimia R, et al: Effects of ouabain on impaired left ventricular function in acute myocardial infarction. *N Engl J Med* 287: 527-533, 1972
22. Rahimtoola SH, DiGilio MM, Sinno MZ, et al: Effects of ouabain on impaired left ventricular function during convalescence after acute myocardial infarction. *Circulation* 44:866-876, 1971
23. DeMots H, McAnulty JH, Porter G, et al: Effects of rapid and slow infusion of ouabain on systemic and coronary vascular resistance in patients without heart failure. *Circulation* 52(Suppl II):77, 1975
24. Weiner L, Dwyer EM, Cox JW: Left ventricular hemodynamics in exercise-induced angina pectoris. *Circulation* 38:240-249, 1968
25. Kitamura K, Jorgensen CR, Gobel FL, et al: Hemodynamic correlates of myocardial oxygen consumption during upright exercise. *J Appl Physiol* 32:516-522, 1972
26. Wilksinson PL, Moyers JR, Ports T, et al: Rate-pressure product and myocardial oxygen consumption during surgery for coronary artery bypass. *Circulation* 60(Suppl I): 170-173, 1979
27. Weiss AB, Regan TJ: A comparison of thermodilution coronary sinus blood flows and krypton myocardial blood flows in the intact dog. *Cardiovasc Res* 8:526-533, 1974
28. Simonsen S: Aspects of cardiac venous flow measured by continuous infusion thermodilution technique. *Cardiology* 62:51-62, 1977
29. Mathey DG, Chatterjee K, Tyberg JV, et al: Coronary sinus reflux: A source of error in the measurement of thermodilution coronary sinus flow. *Circulation* 57:778-786, 1978
